# Supplementary material for: Manganese-driven CoQ deficiency
Source: PubMed Central journal article supplement (PMC9563070; doi:10.1038/s41467-022-33641-x), 2022-10-13
Supplement: 41467_2022_33641_MOESM3_ESM.pdf [file 41467_2022_33641_MOESM3_ESM.pdf]

# Inventory of Supporting Information

## Supplementary Information.

Including:

**Supplementary Figure 1.** Cellular Mn overload results in accumulation of Mn within mitochondria, reduced mitochondrial mass and extra-mitochondrial accumulation of reactive oxygen species.

**Supplementary Figure 2.** Overexpression of Coq4 does not prevent Mn-driven respiratory defects.

**Supplementary Figure 3.** Proteins associated with CoQ metabolism are not generally deregulated upon Mn overload.

**Supplementary Figure 4.** Mn overload causes destabilization of Coq7.

**Supplementary Figure 5.** Gating strategies for flow cytometry.

**Supplementary Table 1.** Total cellular Mn levels in yeast mutants lacking proteins involved in Mn homeostasis.

**Supplementary Table 2.** Total cellular metal concentrations in cells lacking Pmr1.

**Supplementary Table 3.** Yeast strains used in this study.

**Supplementary Table 4.** Plasmids used in this study.

**Supplementary Table 5.** Oligonucleotides used for gene deletion, chromosomal tagging and introduction of point mutations.

**Supplementary Table 6.** Oligonucleotides used to construct plasmids.

**Supplementary Table 7.** Instrument specifications S2 Picofox spectrometer

**Supplementary Table 8.** Oligonucleotides used in this study for qRT-PCR.

**Supplementary Table 9.** Details of statistical analyses performed.

## Supplementary Data 1.

DeqMS analysis of proteomics data, corresponding to Fig. 1e.

## Reporting Summary.

## Source Data file.

Contains numerical data, gels and blots for all graphs presented within the Figures and Supplementary Figures.
